# Supplementary material for: Epitope-specific antibody response is controlled by immunoglobulin VH polymorphisms
Source: PubMed Central journal article supplement — J Exp Med. 2014 Mar 10;211(3):405–11. doi: 10.1084/jem.20130968 (PMC3949579; doi:10.1084/jem.20130968), 2014-03-10
Supplement: supp_jem.20130968_JEM_20130968_sm.pdf [file supp_jem.20130968_JEM_20130968_sm.pdf]

SUPPLEMENTAL MATERIAL

Raposo et al., <http://www.jem.org/cgi/content/full/jem.20130968/DC1>

|                                 |                           | CDR1      |                | CDR2              |                                  |
|---------------------------------|---------------------------|-----------|----------------|-------------------|----------------------------------|
| <i>Ighv1-4</i>                  | QVQLQQSGAELAKPGTSVKMSCKAS | GYTFTTSYW | MNWKQRPQGLEWIG | AINPSNGYTEYNQKPKD | KAILTADKSSSTAYMQLSSLTSEDSAVYYCAR |
| M2139                           | -----                     | ---I---   | -----          | ---D---           | ---M--R-----L----                |
| M284                            | -----                     | ---I---   | -----          | ---D---           | ---M-----                        |
| M287                            | -----                     | ---I---   | -----          | ---DA--D--N---    | ---R-----L----                   |
| <i>Ighv1-4</i>                  | QVQLQQSGAELAKPGTSVKMSCKAS | GYTFTTSYW | MNWKQRPQGLEWIG | AINPSNGYTEYNQKPKD | KAILTADKSSSTAYMQLSSLTSEDSAVYYCAR |
| A/J                             | -----                     | -----     | -----          | -----             | -----                            |
| AKR/J                           | -----E---R--A-----        | ---R--    | -H-----A-----  | --Y-G-SD-S-----G  | --K--VT-A-----E-----             |
| BALB/cJ                         | -----R--A-----            | ---R--    | -H-----        | Y---S--D-----     | --T-----                         |
| C3H/HeJ                         | -----E---R--A-----        | ---R--    | -H-----A-----  | --Y-G-SD-S-----G  | --K--VT-A-----E-----             |
| C57BL/6J                        | -----R--A-----            | ---T      | -H-----        | Y---S--K-----     | --T-----                         |
| C57BL/10.Q                      | -----R--A-----            | ---T      | -H-----        | Y---S--K-----     | --T-----                         |
| CBA/J                           | -----E---R--A-----        | ---R--    | -H-----A-----  | --Y-G-SD-S-----G  | --K--VT-A-----E-----             |
| DBA/2J                          | -----R--A-----            | ---T      | -H-----        | Y---S--K-----     | --T-----                         |
| LP/J                            | -----R--A-----            | ---T      | -H-----        | Y---S--K-----     | --T-----                         |
| <i>Ighv1-4</i>                  | QVQLQQSGAELAKPGTSVKMSCKAS | GYTFTTSYW | MNWKQRPQGLEWIG | AINPSNGYTEYNQKPKD | KAILTADKSSSTAYMQLSSLTSEDSAVYYCAR |
| M2139 <sub>ScFv</sub>           | -----                     | ---I---   | -----          | ---D---           | ---M--R-----L----                |
| M2139 <sub>ScFv-S31R</sub>      | -----                     | ---IR---  | -----          | ---D---           | ---M--R-----L----                |
| M2139 <sub>ScFv-M33T</sub>      | -----                     | ---I--T   | -----          | ---D---           | ---M--R-----L----                |
| M2139 <sub>ScFv-S31R-M33T</sub> | -----                     | ---IR-T   | -----          | ---D---           | ---M--R-----L----                |
| DBA <sub>ScFv</sub>             | -----                     | ---I---   | -----          | ---D---           | ---M--R-----L----                |
| B6 <sub>ScFv</sub>              | -----R--A-----            | ---T      | -H-----        | Y---S--K-----     | --T-----                         |

**Figure S1. Amino acid sequences of the anti-J1 recognizing V<sub>H</sub> segments.** M2139, M284, and M287 are all anti-J1 mAb raised in the DBA/1J mouse strain. All sequences are compared with the germline-encoded *Ighv1-4* gene from the DBA/1J mouse strain. All ScFv constructs use an identical V<sub>L</sub> sequence, identical to the one expressed by the M2139 mAb.

**A**  
 DIVLTQSPASLAVSLGQRATISCRASESVEYFGTSLMQ  
 WYQKPGQPPKLLIYAASNVEGVPARFSGSGGTD  
 LNIHPVEDDIAMFYCQQSREVPTFGGSKLEIKRGG  
 GSGGGSGGGSGGGGQVQLQQSGAELARPGTSVKM  
 SCKASGYTFISYWMNWKQRPQGLEWIGAINPSDGYT  
 EYNQKFKDKAIMTADRSSSTAYMQLSSLTSEDSALYYC  
 ARYGGYFDYWGGTTLTVSSAASNGLPETGHHHHHH

**B**  
 DIVLTQSPASLAVSLGQRATISCRASESVEYFGTSLMQ  
 WYQKPGQPPKLLIYAASNVEGVPARFSGSGGTD  
 LNIHPVEDDIAMFYCQQSREVPTFGGSKLEIKRAD  
 AAPTVSIFPPSSEQLTSGGASVVCFLNFPYKDI  
 NPKVWIDGSRQNGVLSWTDQDSKDYMSSTLTLTKDEY  
 ERHNSYTCETHKTSSTPIVKSFNRNEC

**C**  
 QVQLQQSGAELAKPGTSVKMSCKASGYTFISYWMNWK  
 QRPQGLEWIGAINPSDGYTEYNQKFKDKAIMTADRSS  
 STAYMQLSSLTSEDSALYYCARYGGYFDYWGGTTLTV  
 SSAKTTTPSVYPLAPGCGDTTGSVTLGCLVKGYPES  
 VTVTWNSGSLSSVHTFPALLQSGLYTMSSSVTPSS  
 WPSQVTVCSVAHPASSTIVDKKLEPSGPISTINCP  
 PCKECHKCPAPNLEGGPSVFIKPPNPKDVLMI  
 SLTPKVTCLVVDVEDDQVQISWVFNVEVHTAQ  
 TQTHREDYNSITIRVSTLPIQHQDWMGKFKCKV  
 NNKDLPSPIERTISKIKGLVRAPQVYILPPPAE  
 QLSRKDVSLTCLVVGFNPDISVEWTSNGHT  
 EENYKDTAPVLDSDGSYFIYSKLNMMKTSK  
 WEKTDTSFSCNVRHEGLKNYYLKKIISRSPGK

**Figure S2. Amino acid sequences of the M2139 antibodies.** (A) Sequence of the M2139<sub>ScFv</sub> expressed in *E. coli*. (B and C) Sequence of the light chain (B) and heavy chain (C) of the M2139<sub>Ig</sub> expressed in HEK293T cells.

**Table S1.** M2139<sub>Fab</sub>-J1 crystal data collection and refinement statistics

| Parameters                                  | M2139 <sub>Fab</sub> -J1           |
|---------------------------------------------|------------------------------------|
| <b>Data collection</b>                      |                                    |
| Space group                                 | P3 <sub>1</sub> 21                 |
| Cell dimensions a, b, c (Å)                 | 95.2, 95.2, 190.4                  |
| Resolution (Å)                              | 82.5–3.25 (3.43–3.25) <sup>a</sup> |
| $R_{merge}$                                 | 0.082 (0.643)                      |
| Mean $I$ ( $\sigma I$ )                     | 13.5 (2.0)                         |
| Completeness (%)                            | 99.7 (99.4)                        |
| Redundancy                                  | 4.7 (4.0)                          |
| Unique reflections                          | 16,327 (2,325)                     |
| <b>Refinement</b>                           |                                    |
| Resolution (Å)                              | 50.0–3.25                          |
| Number of reflections                       | 15,467                             |
| $R_{work}/R_{free}$ (%)                     | 22.2/26.3                          |
| Number of atoms/B-factors (Å <sup>2</sup> ) |                                    |
| Protein (M2139 <sub>Fab</sub> )             | 3,291/115.3                        |
| J1 peptide                                  | 479/147.6                          |
| R.m.s. deviations                           |                                    |
| Bond lengths (Å)                            | 0.009                              |
| Bond angles (°)                             | 1.56                               |
| Ramachandran plot, number of residues       |                                    |
| Favored region                              | 440 (94.8%)                        |
| Allowed                                     | 22 (4.7%)                          |
| Outliers                                    | 2 (0.4%)                           |

<sup>a</sup>Values given in parenthesis refer to the highest resolution shell.

**Table S2.** CDR contributions to the surface area buried upon interaction of M2139<sub>Fab</sub> and J1 peptide

| CDR                                       | Residue | $\Delta$ BSA              | Sum $\Delta$ BSA |
|-------------------------------------------|---------|---------------------------|------------------|
|                                           |         | $\text{\AA}^2$ (% of ASA) |                  |
| L1                                        | E27     | 41.2 (44)                 | 95               |
|                                           | S28     | 2.1 (3)                   |                  |
|                                           | Y31     | 42.5 (37)                 |                  |
|                                           | L36     | 9.5 (21)                  |                  |
| L2                                        | -       | -                         | -                |
| L3                                        | S95     | 8.1 (61)                  | 235              |
|                                           | R96     | 80.7 (74)                 |                  |
|                                           | E97     | 52.8 (92)                 |                  |
|                                           | V98     | 65.4 (84)                 |                  |
|                                           | P99     | 0.7 (4)                   |                  |
|                                           | Y100    | 27.3 (97)                 |                  |
|                                           | H1      | Y27                       |                  |
| H1                                        | T28     | 48.0 (59)                 |                  |
|                                           | I30     | 38.7 (53)                 |                  |
|                                           | S31     | 73.3 (100)                |                  |
|                                           | Y32     | 47.3 (69)                 |                  |
|                                           | W33     | 91.3 (99)                 |                  |
| H2                                        | N35     | 1.4 (100)                 | 117              |
|                                           | A50     | 6.9 (100)                 |                  |
|                                           | N52     | 28.3 (98)                 |                  |
|                                           | S54     | 13.6 (30)                 |                  |
|                                           | D55     | 14.7 (19)                 |                  |
|                                           | Y57     | 15.8 (10)                 |                  |
|                                           | E59     | 38.2 (36)                 |                  |
| H3                                        | Y99     | 31.8 (75)                 | 48               |
|                                           | G100    | 11.2 (30)                 |                  |
|                                           | G101    | 4.9 (16)                  |                  |
| <b>Other M2139<sub>Fab</sub> residues</b> |         |                           |                  |
| H                                         | W47     | 2.5 (34)                  |                  |
| L                                         | D1      | 8.3 (7)                   |                  |
| L                                         | I2      | 1.2 (55)                  |                  |

$\Delta$ BSA = change in accessible surface area (ASA) as calculated by the PISA server at EBI.

**Table S3.** Peptide chain contributions to the surface area buried upon interaction of M2139<sub>Fab</sub> and J1 peptide

| Chain | Residue   | $\Delta$ BSA              | Sum $\Delta$ BSA in $\text{\AA}^2$ |
|-------|-----------|---------------------------|------------------------------------|
|       |           | $\text{\AA}^2$ (% of ASA) |                                    |
| E     | E20       | 33.5 (24)                 | 301                                |
|       | R21       | 81.2 (52)                 |                                    |
|       | G22       | 7.1 (64)                  |                                    |
|       | A23       | 34.9 (56)                 |                                    |
|       | A24       | 63.5 (100)                |                                    |
|       | G25       | 9.4 (100)                 |                                    |
|       | I26       | 33.9 (33)                 |                                    |
|       | A27       | 33.1 (58)                 |                                    |
| F     | G28       | 3.9 (36)                  | 194                                |
|       | R21       | 11.7 (10)                 |                                    |
|       | I26       | 89.7 (70)                 |                                    |
|       | A27       | 14.9 (29)                 |                                    |
|       | G28       | 1.9 (46)                  |                                    |
| G     | P29       | 73.9 (78)                 | 378                                |
|       | K30       | 3.2 (3)                   |                                    |
|       | G22       | 0.2 (4)                   |                                    |
|       | A23       | 54.5 (82)                 |                                    |
|       | A24       | 24.4 (35)                 |                                    |
|       | G25       | 9.4 (65)                  |                                    |
|       | I26       | 131.5 (99)                |                                    |
|       | A27       | 54.1 (92)                 |                                    |
|       | G28       | 13.4 (96)                 |                                    |
|       | P29       | 32.6 (40)                 |                                    |
| K30   | 62.3 (55) |                           |                                    |

$\Delta$ BSA = change in accessible surface area (ASA) as calculated by the PISA server at EBI.

**Table S4.** Hydrogen bonds between J1 peptide and M2139<sub>Fab</sub> observed in the M2139<sub>Fab</sub>-J1 complex

| Number | Fab chain:residue:atom | Distance     | Peptide chain:residue:atom |
|--------|------------------------|--------------|----------------------------|
|        |                        | $\text{\AA}$ |                            |
| 1      | H:I30:O                | 3.2          | E:A24:N                    |
| 2      | H:S31:O                | 2.9          | E:A23:N                    |
| 3      | H:S31:O $\gamma$       | 2.7          | E:G22:O                    |
| 4      | H:Y32:O $\eta$         | 3.0          | E:R21:N $\eta$ 1           |
| 5      | H:W33:N $\epsilon$ 1   | 2.7          | E:G25:O                    |
| 6      | H:N52:N $\delta$ 2     | 3.0          | E:A24:O                    |
| 7      | L:E27:O $\epsilon$ 2   | 2.6 (SB)     | G:K30:N $\zeta$            |
| 8      | L:R96:N $\eta$ 1       | 2.9          | F:A27:O                    |
| 9      | L:E97:O $\epsilon$ 1   | 2.8 (SB)     | G:K30:N $\zeta$            |
| 10     | L:V98:N                | 3.3          | G:G28:O                    |
| 11     | L:Y100:O $\eta$        | 3.0          | G:A27:N                    |

SB, salt bridge.
